# Supplementary material
Source: Springer Nature journal article supplement (https://www.springermedizin.de/resource/supplementary/13045_2011_155_MOESM1_ESM.pdf/9660760)

CGTCCGCCATGTTTCAAACCCTGCGCCCTTTCCCGCCTCTCGCGAGAACACAAGAGCAA**CGTCA**ATCTCCGGAAACGTGA  
GCAGGCGGTACAAAGTTTGGGACGCGGGAAAGGGCGGAGAGCGCTCTTGTGTTCTCGTT**GCAGT**TAGAGGCCTTTGCACT

CREB-1

GGATAACAATACACCGGAAATAGAGAGAAACCTGTTGTGCTCTTTCCTGCTTCCCGCAGTTTTTTAGTGGCCACGGGTATG  
CCTATGTTATGTGGCCTTTATCTCTCTTTGGACAACACGAGAAAGGACGAAGGGCGTCAAAAAATCACCGGTGCCCATAC

GGGTGGAGCTTCCTTTAGGGGCGTGACTAGGCCTCCAACGAAGGGGCGTGGCCAAGCGCACCGCCTCGG**GGCGG**GGCCGG  
CCCACCTCGAAGGAATACCCCGCACTGATCCGGAGGTTGCTTCCCCGCACCGGTTTCGCGTGGCGGAGCC**CCGCC**CCGGCC

Sp1

CGTTCTAGCGCATCGCGGCCGGGTG**CGTCA**CTCGCGAAGTGGAATTTGCCAGACAAGCAAC**ATG**GCTCGGAAACGCGCG  
GCAAGATCGCGTAGCGCCGGCCAC**GCAGT**GAGCGCTTACCTTAAACGGGTCTGTTGTTGTACCGAGCCTTTGCGCGC

CREB-1

Start codon

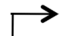

Supplement: MOESM1 [file 9660760]
